# Supplementary material for: Decision making with the deterministic judgment of urea production with various hydrogen sources: technical, economic, and environmental aspects
Source: Royal Society of Chemistry journal article supplement (doi:10.1039/d2gc01936a), 2022-01-01
Supplement: d2gc01936a1.pdf [file d2gc01936a1.pdf]

## Supporting information

Decision making with deterministic judgment of urea production with various  
hydrogen sources: technical, economic, and environmental aspects

Heehyang Kim<sup>1</sup>, Aejin Lee<sup>1</sup>, Hankwon Lim<sup>1\*</sup>

<sup>1</sup>School of Energy and Chemical Engineering

Ulsan National Institute of Science and Technology

50 UNIST-gil, Eonyang-eup, Ulju-gun, Ulsan 44919, Republic of Korea

<sup>2</sup>Graduate School of Carbon Neutrality

Ulsan National Institute of Science and Technology

50 UNIST-gil, Eonyang-eup, Ulju-gun, Ulsan 44919, Republic of Korea

<sup>3</sup>Carbon Neutrality Demonstration and Research Center

Ulsan National Institute of Science and Technology

50 UNIST-gil, Eonyang-eup, Ulju-gun, Ulsan 44919, Republic of Korea

of Korea

\*To whom correspondence should be addressed

Email: [hklim@unist.ac.kr](mailto:hklim@unist.ac.kr)

Tel: +82 52 217 2935

## **1. Process modeling**

This work covered the comprehensive analysis including technical, economic, and environmental aspects, simultaneously, for urea production with different types of hydrogen (H<sub>2</sub>) based on the process modeling results using Aspen Plus<sup>®</sup>. Table S1 shows the main flow results for urea production process modeling including the ammonia synthesis section.

**Table S1.** Main flow results of renewable urea production

|                                   | H <sub>2</sub> | N <sub>2</sub> | 1       | 2       | 3       | 4       |
|-----------------------------------|----------------|----------------|---------|---------|---------|---------|
| Temperature/ °C                   | 25.000         | 25.000         | 24.761  | 172.992 | 120.000 | 235.069 |
| Pressure/ bar                     | 10.000         | 10.000         | 10.000  | 30.000  | 30.000  | 60.000  |
| Molar Vapor Fraction              | 1.000          | 1.000          | 1.000   | 1.000   | 1.000   | 1.000   |
| Molar Liquid Fraction             | 0.000          | 0.000          | 0.000   | 0.000   | 0.000   | 0.000   |
| Mole Flows/ kmol hr <sup>-1</sup> | 214.298        | 71.394         | 285.692 | 285.692 | 285.692 | 285.692 |
| Mole Fractions                    |                |                |         |         |         |         |
| H <sub>2</sub>                    | 1.000          | 0.000          | 0.750   | 0.750   | 0.750   | 0.750   |
| N <sub>2</sub>                    | 0.000          | 1.000          | 0.250   | 0.250   | 0.250   | 0.250   |
| NH <sub>3</sub>                   | 0.000          | 0.000          | 0.000   | 0.000   | 0.000   | 0.000   |
| CO <sub>2</sub>                   | 0.000          | 0.000          | 0.000   | 0.000   | 0.000   | 0.000   |

|                                                            |       |       |       |       |       |       |
|------------------------------------------------------------|-------|-------|-------|-------|-------|-------|
| H <sub>2</sub> O                                           | 0.000 | 0.000 | 0.000 | 0.000 | 0.000 | 0.000 |
| (NH <sub>2</sub> ) <sub>2</sub> CO<br>(Urea)               | 0.000 | 0.000 | 0.000 | 0.000 | 0.000 | 0.000 |
| NH <sub>2</sub> COONH <sub>4</sub><br>(Ammonium carbamate) | 0.000 | 0.000 | 0.000 | 0.000 | 0.000 | 0.000 |
| O <sub>2</sub>                                             | 0.000 | 0.000 | 0.000 | 0.000 | 0.000 | 0.000 |

(Continuous)

|                       | 5       | 6       | 7       | 8       | 9       | 10      |
|-----------------------|---------|---------|---------|---------|---------|---------|
| Temperature/ °C       | 240.000 | 364.538 | 360.000 | 461.714 | 480.000 | 332.291 |
| Pressure/ bar         | 60.000  | 100.000 | 100.000 | 150.000 | 150.000 | 50.000  |
| Molar Vapor Fraction  | 1.000   | 1.000   | 1.000   | 1.000   | 1.000   | 1.000   |
| Molar Liquid Fraction | 0.000   | 0.000   | 0.000   | 0.000   | 0.000   | 0.000   |

|                                                            |         |         |         |         |         |         |
|------------------------------------------------------------|---------|---------|---------|---------|---------|---------|
| Mole Flows/ kmol hr <sup>-1</sup>                          | 285.692 | 285.692 | 285.692 | 285.692 | 285.692 | 460.342 |
| Mole Fractions                                             |         |         |         |         |         |         |
| H <sub>2</sub>                                             | 0.750   | 0.750   | 0.750   | 0.750   | 0.750   | 0.693   |
| N <sub>2</sub>                                             | 0.250   | 0.250   | 0.250   | 0.250   | 0.250   | 0.230   |
| NH <sub>3</sub>                                            | 0.000   | 0.000   | 0.000   | 0.000   | 0.000   | 0.075   |
| CO <sub>2</sub>                                            | 0.000   | 0.000   | 0.000   | 0.000   | 0.000   | 0.000   |
| H <sub>2</sub> O                                           | 0.000   | 0.000   | 0.000   | 0.000   | 0.000   | 0.002   |
| (NH <sub>2</sub> ) <sub>2</sub> CO<br>(Urea)               | 0.000   | 0.000   | 0.000   | 0.000   | 0.000   | 0.000   |
| NH <sub>2</sub> COONH <sub>4</sub><br>(Ammonium carbamate) | 0.000   | 0.000   | 0.000   | 0.000   | 0.000   | 0.000   |
| O <sub>2</sub>                                             | 0.000   | 0.000   | 0.000   | 0.000   | 0.000   | 0.000   |

(Continuous)

|                                   | 11      | 12      | 13      | 14      | 15      | 16      |
|-----------------------------------|---------|---------|---------|---------|---------|---------|
| Temperature/ °C                   | 605.451 | 480.000 | 931.265 | 948.607 | 948.609 | 100.000 |
| Pressure/ bar                     | 150.000 | 150.000 | 150.000 | 150.000 | 150.000 | 150.000 |
| Molar Vapor Fraction              | 1.000   | 1.000   | 1.000   | 1.000   | 1.000   | 1.000   |
| Molar Liquid Fraction             | 0.000   | 0.000   | 0.000   | 0.000   | 0.000   | 0.000   |
| Mole Flows/ kmol hr <sup>-1</sup> | 460.342 | 460.342 | 339.589 | 334.912 | 334.911 | 334.911 |
| Mole Fractions                    |         |         |         |         |         |         |
| H <sub>2</sub>                    | 0.693   | 0.693   | 0.406   | 0.390   | 0.390   | 0.390   |
| N <sub>2</sub>                    | 0.230   | 0.230   | 0.135   | 0.130   | 0.130   | 0.130   |
| NH <sub>3</sub>                   | 0.075   | 0.075   | 0.457   | 0.478   | 0.478   | 0.478   |
| CO <sub>2</sub>                   | 0.000   | 0.000   | 0.000   | 0.000   | 0.000   | 0.000   |

|                                                            |       |       |       |           |           |           |
|------------------------------------------------------------|-------|-------|-------|-----------|-----------|-----------|
| H <sub>2</sub> O                                           | 0.002 | 0.002 | 0.002 | 2.497E-03 | 2.497E-03 | 2.497E-03 |
| (NH <sub>2</sub> ) <sub>2</sub> CO<br>(Urea)               | 0.000 | 0.000 | 0.000 | 0.000     | 0.000     | 0.000     |
| NH <sub>2</sub> COONH <sub>4</sub><br>(Ammonium carbamate) | 0.000 | 0.000 | 0.000 | 0.000     | 0.000     | 0.000     |
| O <sub>2</sub>                                             | 0.000 | 0.000 | 0.000 | 0.000     | 0.000     | 0.000     |

(Continuous)

|                       | 17     | 18     | 19     | Purge    | 20       | 21      |
|-----------------------|--------|--------|--------|----------|----------|---------|
| Temperature/ °C       | 20.000 | 22.634 | 20.000 | 20.000   | 20.000   | 351.011 |
| Pressure/ bar         | 5.000  | 5.000  | 5.000  | 5.000    | 5.000    | 50.000  |
| Molar Vapor Fraction  | 0.000  | 0.0123 | 1.000  | 1.000    | 1.000    | 1.000   |
| Molar Liquid Fraction | 1.000  | 0.988  | 0.000  | 1.00E-10 | 1.00E-10 | 0.000   |

|                                                            |          |           |           |           |           |           |
|------------------------------------------------------------|----------|-----------|-----------|-----------|-----------|-----------|
| Mole Flows/ kmol hr <sup>-1</sup>                          | 9991.520 | 10326.431 | 218.319   | 43.664    | 174.650   | 174.650   |
| Mole Fractions                                             |          |           |           |           |           |           |
| H <sub>2</sub>                                             | 0.000    | 0.0127    | 0.599     | 0.599     | 0.599     | 0.599     |
| N <sub>2</sub>                                             | 0.000    | 4.202E-03 | 0.199     | 0.199     | 0.199     | 0.199     |
| NH <sub>3</sub>                                            | 0.000    | 0.0155    | 0.198     | 0.198     | 0.198     | 0.198     |
| CO <sub>2</sub>                                            | 0.000    | 0.000     | 0.000     | 0.000     | 0.000     | 0.000     |
| H <sub>2</sub> O                                           | 1.000    | 0.968     | 4.788E-03 | 4.788E-03 | 4.788E-03 | 4.788E-03 |
| (NH <sub>2</sub> ) <sub>2</sub> CO<br>(Urea)               | 0.000    | 0.000     | 0.000     | 0.000     | 0.000     | 0.000     |
| NH <sub>2</sub> COONH <sub>4</sub><br>(Ammonium carbamate) | 0.000    | 0.000     | 0.000     | 0.000     | 0.000     | 0.000     |
| O <sub>2</sub>                                             | 0.000    | 0.000     | 0.000     | 0.000     | 0.000     | 0.008     |



(Continuous)

|                                   | 22      | 23        | 24        | 25      | 26        | CO <sub>2</sub> |
|-----------------------------------|---------|-----------|-----------|---------|-----------|-----------------|
| Temperature/ °C                   | 100.000 | 20.000    | 21.976    |         | 20.000    | 100.000         |
| Pressure/ bar                     | 50.000  | 5.000     | 146.000   | 146.000 | 146.000   | 138.274         |
| Molar Vapor Fraction              | 1.000   | 0.000     | 0.000     |         | 0.000     | 1.000           |
| Molar Liquid Fraction             | 0.000   | 1.000     | 1.000     |         | 1.000     | 0.000           |
| Mole Flows/ kmol hr <sup>-1</sup> | 174.650 | 10108.112 | 10108.112 |         | 10108.112 | 65.000          |
| Mole Fractions                    |         |           |           |         |           |                 |
| H <sub>2</sub>                    | 0.599   | 2.429E-07 | 2.429E-07 |         | 2.429E-07 | 0.000           |
| N <sub>2</sub>                    | 0.199   | 5.221E-08 | 5.221E-08 |         | 5.221E-08 | 0.0594          |
| NH <sub>3</sub>                   | 0.198   | 0.0116    | 0.0116    |         | 0.0116    | 0.000           |
| CO <sub>2</sub>                   | 0.000   | 0.000     | 0.000     |         | 0.000     | 0.922           |

|                                                            |           |       |       |  |       |          |
|------------------------------------------------------------|-----------|-------|-------|--|-------|----------|
| H <sub>2</sub> O                                           | 4.788E-03 | 0.988 | 0.988 |  | 0.988 | 0.0103   |
| (NH <sub>2</sub> ) <sub>2</sub> CO<br>(Urea)               | 0.000     | 0.000 | 0.000 |  | 0.000 | 0.000    |
| NH <sub>2</sub> COONH <sub>4</sub><br>(Ammonium carbamate) | 0.000     | 0.000 | 0.000 |  | 0.000 | 0.000    |
| O <sub>2</sub>                                             | 0.000     | 0.000 | 0.000 |  | 0.000 | 8.10E-03 |

(Continuous)

|                       | 27      | 28        | 29      | Urea    |
|-----------------------|---------|-----------|---------|---------|
| Temperature/ °C       | 167.000 | 161.000   | 161.000 | 161.000 |
| Pressure/ bar         | 141.000 | 141.000   | 141.000 | 141.000 |
| Molar Vapor Fraction  | 0.000   | 2.360E-05 | 0.000   | 0.0946  |
| Molar Liquid Fraction | 1.000   | 1.000     | 1.000   | 0.905   |

|                                                            |           |           |           |           |
|------------------------------------------------------------|-----------|-----------|-----------|-----------|
| Mole Flows/ kmol hr <sup>-1</sup>                          | 10057.482 | 10114.719 | 10049.215 | 65.504    |
| Mole Fractions                                             |           |           |           |           |
| H <sub>2</sub>                                             | 2.441E-07 | 2.427E-07 | 0.000     | 3.748E-05 |
| N <sub>2</sub>                                             | 3.840E-04 | 3.818E-04 | 0.000     | 0.0590    |
| NH <sub>3</sub>                                            | 1.161E-04 | 1.155E-04 | 0.000     | 0.0178    |
| CO <sub>2</sub>                                            | 2.118E-04 | 2.106E-04 | 0.000     | 0.0325    |
| H <sub>2</sub> O                                           | 0.993     | 0.994     | 1.000     | 0.000     |
| (NH <sub>2</sub> ) <sub>2</sub> CO<br>(Urea)               | 0.000     | 5.659E-03 | 0.000     | 0.874     |
| NH <sub>2</sub> COONH <sub>4</sub><br>(Ammonium carbamate) | 5.748E-03 | 5.716E-05 | 0.000     | 8.826E-03 |
| O <sub>2</sub>                                             | 5.236E-05 | 5.206E-05 | 0.000     | 8.039E-03 |

## 2. Economic assessment

All cost functions that can calculate for each investment items regarding renewable urea production were presented.

|                                                                                                                                                                                        |             |
|----------------------------------------------------------------------------------------------------------------------------------------------------------------------------------------|-------------|
| $C_{Cap} = C_{Ref} \times \left(\frac{A_a}{A_b}\right)^n \times \left(\frac{I_a}{I_b}\right)$ <p>where n is a cost exponent, I is the CEPCI, and A is the attribution of equipment</p> | Equation S1 |
| $C_F = 2.47 \times 9.832 \times (F_g)^{0.8}$ <p>where <math>F_g</math> is the feed rate (kg s<sup>-1</sup>) of gas into flash drum</p>                                                 | Equation S2 |
| $C_C = 8650 \times \left(\frac{W_{cp}}{\eta_{cp}}\right)^{0.82}$ <p>where <math>W_{cp}</math> is compressor power (hp) and <math>\eta_{cp}</math> is the compressor efficiency (%)</p> | Equation S3 |
| $\log_{10} C_p^0 = K_1 + K_2 \log_{10}(A) + K_3 [\log_{10}(A)]^2$ <p>where <math>C_p^0</math> is equipment cost, A is feed flow rate or duty, K values are used in correlation</p>     | Equation S4 |
| $C_u = 1.6917 \times 8000 \times 3600 \times M_u$ <p>where <math>M_u</math> is mass flow rate (kg s<sup>-1</sup>) for urea synthesis</p>                                               | Equation S5 |
| $CRF = \frac{a(1+a)^n}{(1+a)^n - 1}$ <p>where n is the project period and a is a discount rate</p>                                                                                     | Equation S6 |
| $C_R = C_{H_2} \times F_{H_2} \times MW_{H_2} + (C_{CO_2} - CD_{CO_2}) \times F_{CO_2} \times MW_{CO_2} + C_{N_2} \times F_{N_2}$                                                      | Equation S7 |

---

where  $F$  is feed flow rate ( $\text{kmol h}^{-1}$ ) from process simulation results,  $MW$  is molecular weight ( $\text{kg kmol}^{-1}$ ),  $C_{CO_2}$  is cost of  $CO_2$  capture ( $74 \text{ \$ ton}^{-1}$ )<sup>1</sup>, and  $CD_{CO_2}$  is cost of  $CO_2$  credit ( $29.6 \text{ \$ ton}^{-1}$ )<sup>2</sup>,  $C_{N_2}$  is cost of  $N_2$  ( $0.01 \text{ \$ kg}^{-1}$ )<sup>3</sup>.

---

### 3. Environmental assessment

For environmental assessment, the respective values of  $CO_2$  emissions according to  $H_2$  production technology from many works of literature were used to assess the carbon footprint analysis of renewable urea production. Table S2 indicates the amount of  $CO_2$  emissions of  $H_2$  production technology.

**Table S2.** Carbon dioxide emissions of hydrogen production technology

| Hydrogen (H <sub>2</sub> ) production technology | Carbon dioxide (CO <sub>2</sub> ) emissions/ kgCO <sub>2</sub> eq<br>kg-urea <sup>-1</sup> | Ref |
|--------------------------------------------------|--------------------------------------------------------------------------------------------|-----|
| Steam methane reforming (SMR)                    | 2.20                                                                                       | 4   |
| SMR                                              | 2.04                                                                                       | 5   |
| SMR                                              | 1.72                                                                                       | 6   |
| SMR                                              | 2.03                                                                                       | 7   |
| SMR                                              | 1.91                                                                                       | 8   |
| SMR                                              | 1.86                                                                                       | 9   |
| SMR                                              | 2.04                                                                                       | 10  |
| SMR                                              | 1.90                                                                                       | 11  |
| SMR                                              | 2.02                                                                                       | 12  |

|                                       |      |    |
|---------------------------------------|------|----|
| SMR                                   | 1.99 | 13 |
| SMR with carbon capture storage (CCS) | 1.44 | 4  |
| SMR with CCS                          | 1.29 | 6  |
| SMR with CCS                          | 1.11 | 14 |
| SMR with CCS                          | 1.18 | 15 |
| Coal gasification (CG)                | 2.88 | 4  |
| CG                                    | 3.23 | 4  |
| CG                                    | 1.96 | 16 |
| CG                                    | 1.99 | 17 |
| CG                                    | 1.96 | 18 |
| Methane pyrolysis                     | 1.50 | 4  |
| Methane pyrolysis                     | 1.23 | 19 |

|                    |      |    |
|--------------------|------|----|
| Methane pyrolysis  | 1.27 | 20 |
| Methane pyrolysis  | 1.06 | 21 |
| Methane pyrolysis  | 1.08 | 22 |
| Wind electrolysis  | 0.91 | 4  |
| Wind electrolysis  | 0.93 | 5  |
| Wind electrolysis  | 0.92 | 6  |
| Wind electrolysis  | 0.83 | 7  |
| Wind electrolysis  | 0.89 | 19 |
| Wind electrolysis  | 0.95 | 23 |
| Wind electrolysis  | 0.92 | 18 |
| Solar electrolysis | 1.02 | 4  |
| Solar electrolysis | 1.44 | 5  |



|                                    |      |    |
|------------------------------------|------|----|
| Solar electrolysis                 | 1.07 | 5  |
| Solar electrolysis                 | 1.03 | 6  |
| Solar electrolysis                 | 1.04 | 6  |
| Solar electrolysis                 | 0.86 | 7  |
| Solar electrolysis                 | 1.14 | 17 |
| Solar electrolysis                 | 1.03 | 17 |
| Solar electrolysis                 | 1.03 | 23 |
| Solar electrolysis                 | 1.07 | 18 |
| Water electrolysis, diaphragm cell | 0.92 | 7  |
| Water electrolysis, membrane cell  | 0.92 | 7  |
| Water electrolysis, mercury cell   | 0.93 | 7  |
| High temperature electrolysis      | 1.03 | 11 |

|                                       |      |    |
|---------------------------------------|------|----|
| High temperature electrolysis         | 1.03 | 5  |
| Nuclear high temperature electrolysis | 0.90 | 4  |
| Nuclear high temperature electrolysis | 1.02 | 6  |
| Cu-Cl cycle                           | 0.89 | 6  |
| Nuclear high temperature electrolysis | 0.86 | 24 |
| Nuclear conventional electrolysis     | 0.87 | 24 |
| Cu-Cl cycle                           | 0.97 | 25 |
| Cu-Cl cycle                           | 0.96 | 26 |
| Cu-Cl cycle                           | 0.95 | 26 |
| Nuclear electrolysis                  | 0.89 | 26 |
| Nuclear high temperature electrolysis | 0.87 | 26 |
| Cu-Cl cycle                           | 0.90 | 23 |

|                                       |      |    |
|---------------------------------------|------|----|
| S-I cycle                             | 0.87 | 23 |
| Nuclear high temperature electrolysis | 1.03 | 23 |
| Cu-Cl cycle                           | 1.51 | 27 |
| Cu-Cl cycle                           | 1.68 | 28 |
| Cu-Cl cycle                           | 1.69 | 11 |
| S-I cycle                             | 0.87 | 11 |
| S-I cycle                             | 1.08 | 29 |
| Cu-Cl cycle                           | 2.07 | 18 |

#### 4. Analytic hierarchy process

Fig. S1 – S6 represent the results of the analytic hierarchy process (AHP) for 30 selected cases in terms of weighted values as well as priority. Each of the figures indicates that priorities result in different types of H<sub>2</sub>.

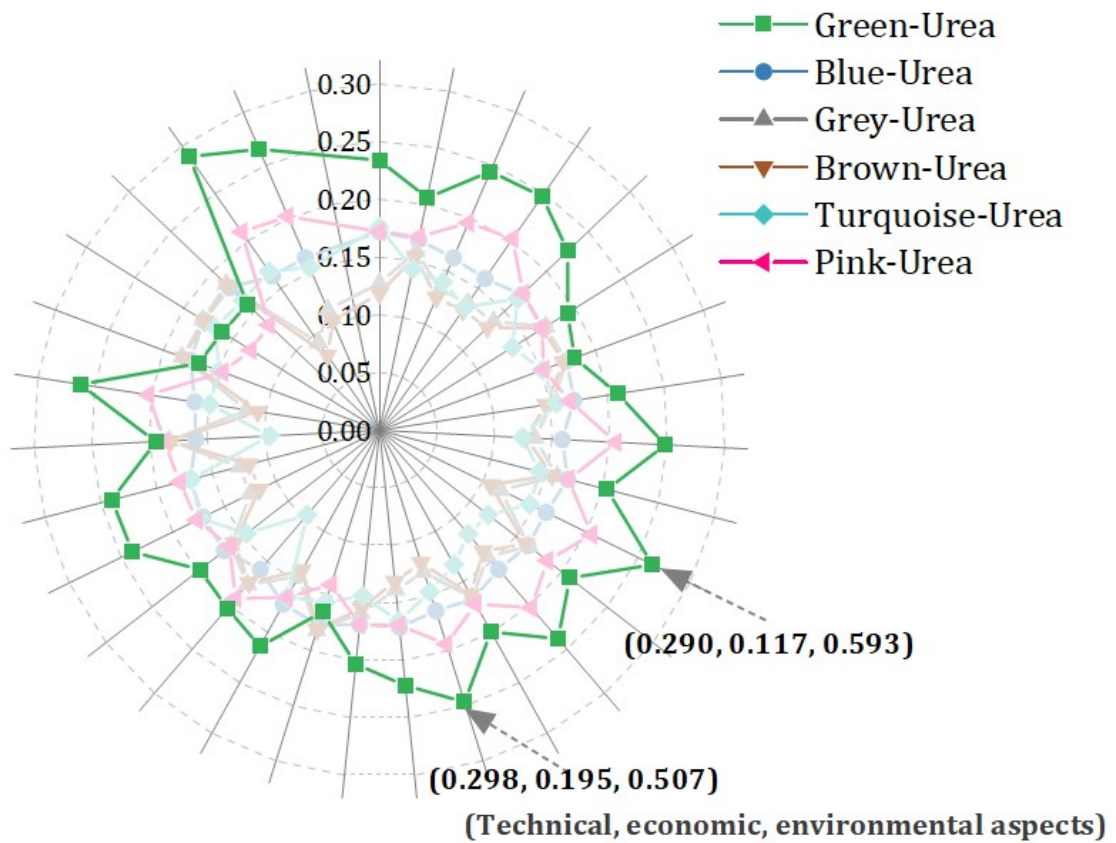

**Fig. S1.** AHP results for 30 selected cases in terms of weighted values with green urea

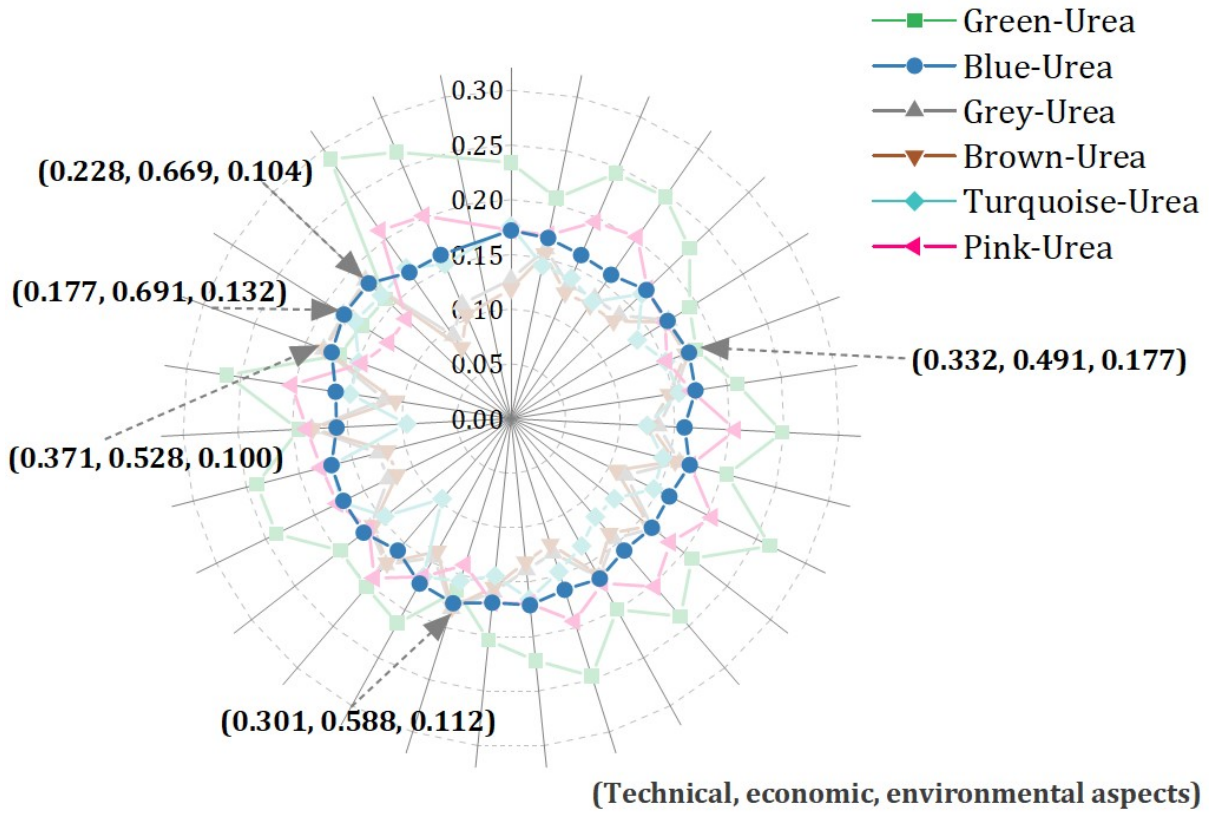

Fig. S2. AHP results for 30 selected cases in terms of weighted values with blue urea

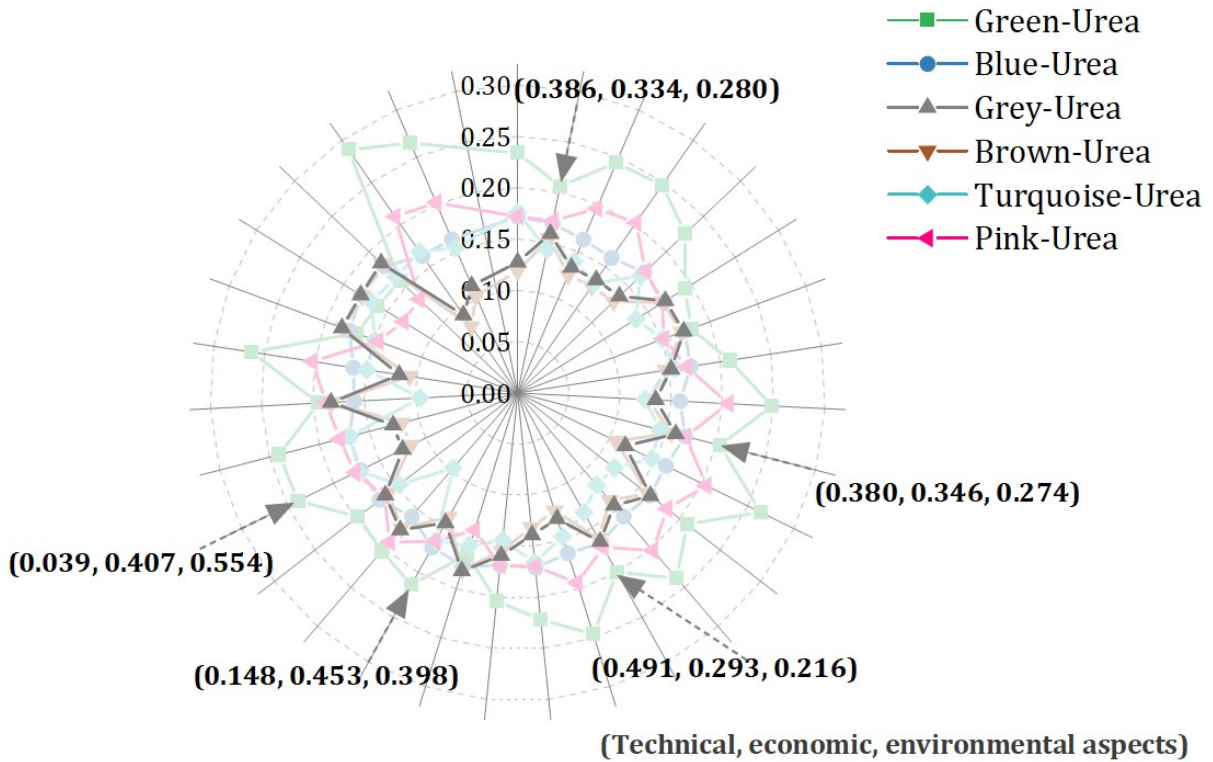

Fig. S3. AHP results for 30 selected cases in terms of weighted values with grey urea

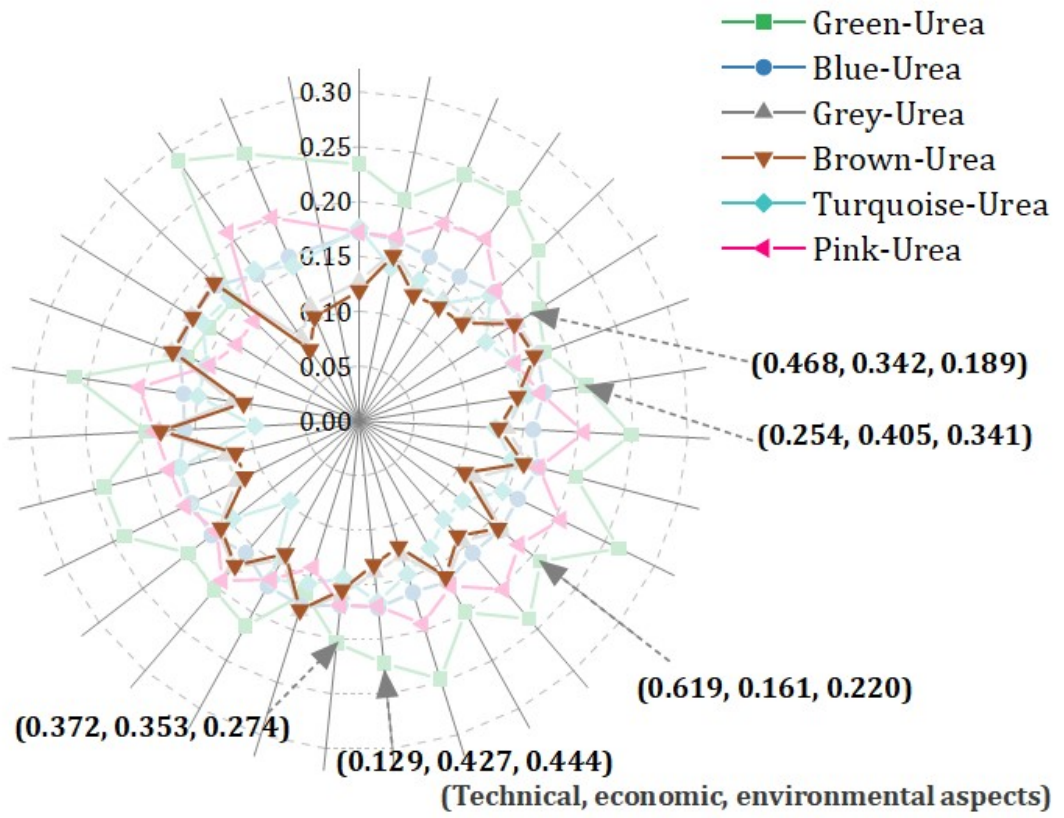

Fig. S4. AHP results for 30 selected cases in terms of weighted values with brown urea

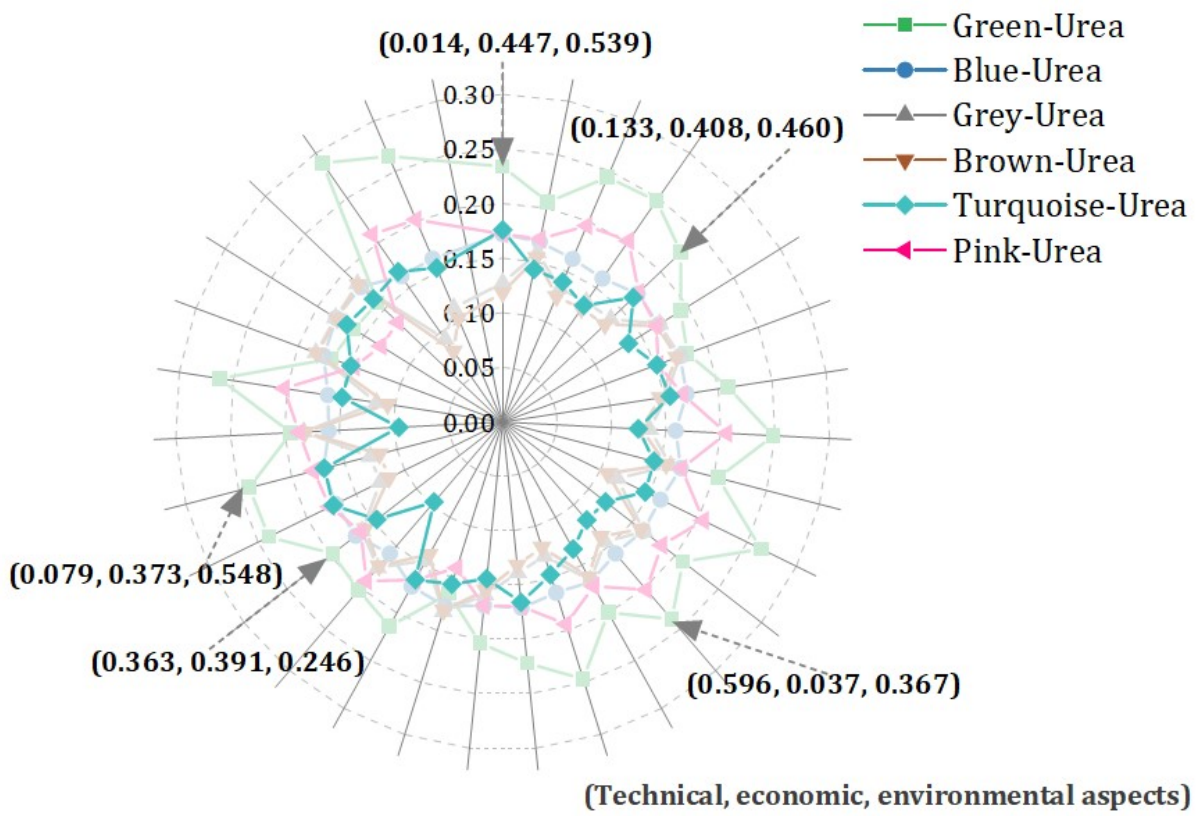

Fig. S5. AHP results for 30 selected cases in terms of weighted values with turquoise urea



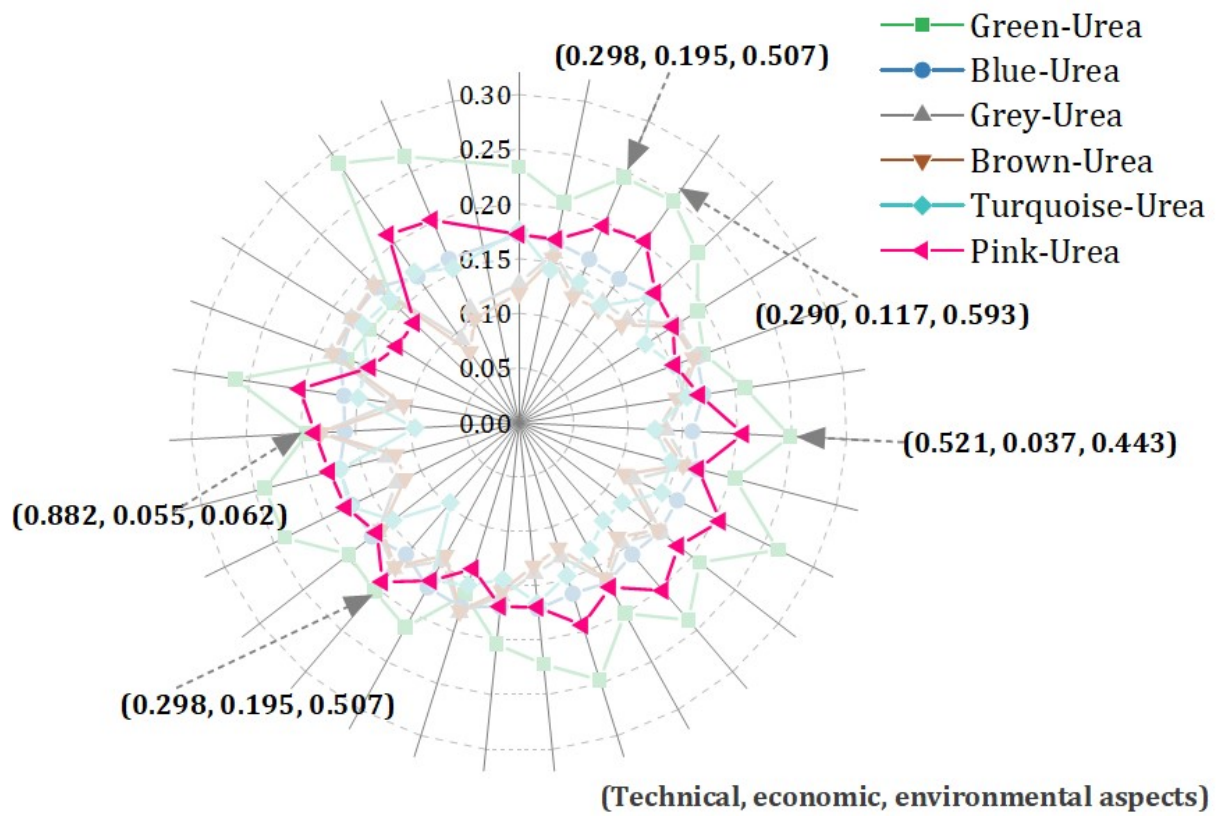

**Fig. S6.** AHP results for 30 selected cases in terms of weighted values with pink urea



## 5. Fitted line plot for various H<sub>2</sub> production costs.

Fig. S7 – S12 shows a fitted line plot for various H<sub>2</sub> production costs. Based on this fitted line plot for H<sub>2</sub> production cost results, the unit urea production cost that relies on H<sub>2</sub> prices was estimated as follows.

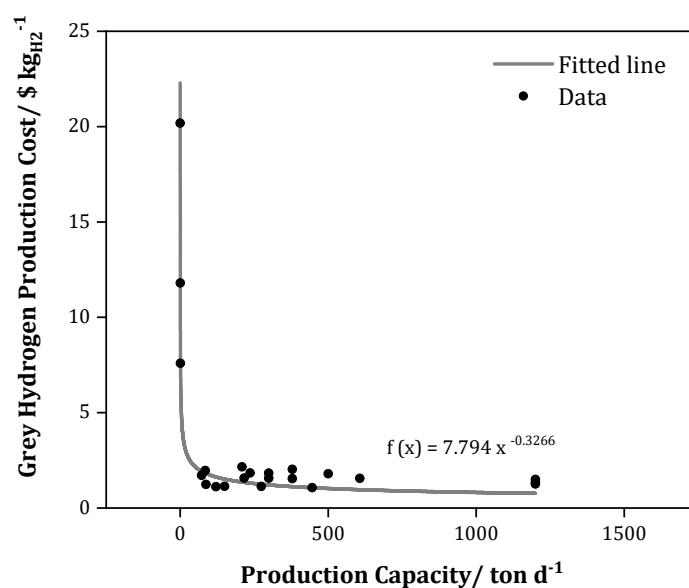

Fig. S7. Fitted line plot for grey hydrogen production cost.

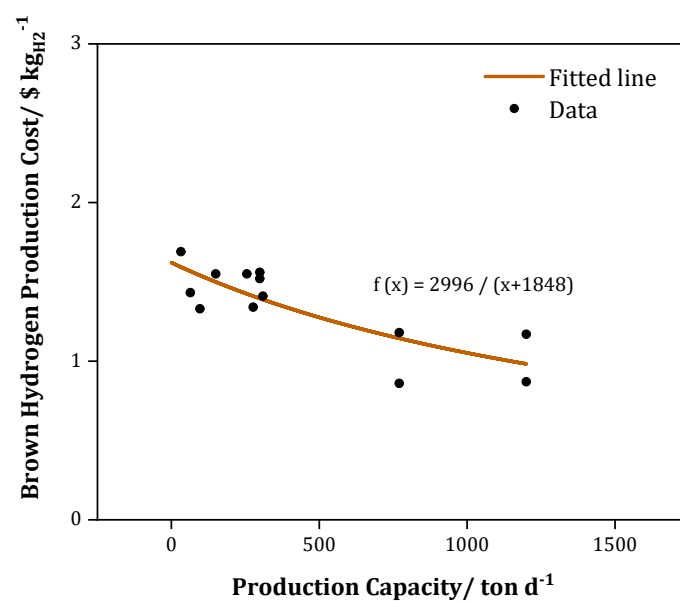

Fig. S8. Fitted line plot for brown hydrogen production cost.

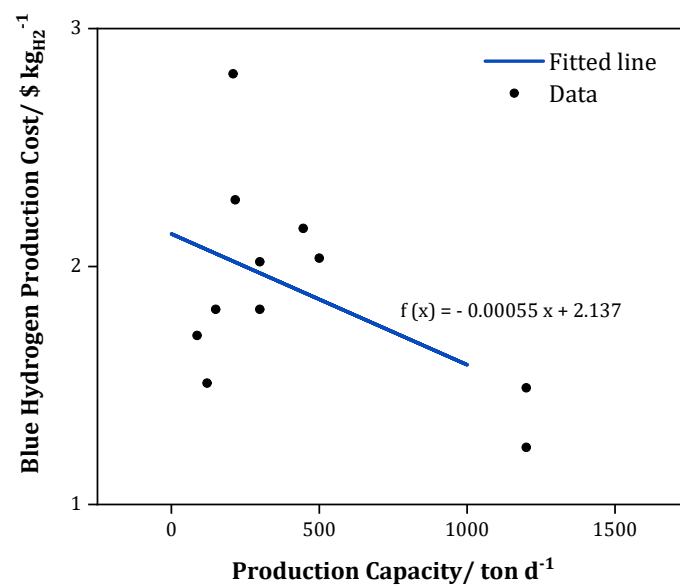

Fig. S9. Fitted line plot for blue hydrogen production cost.

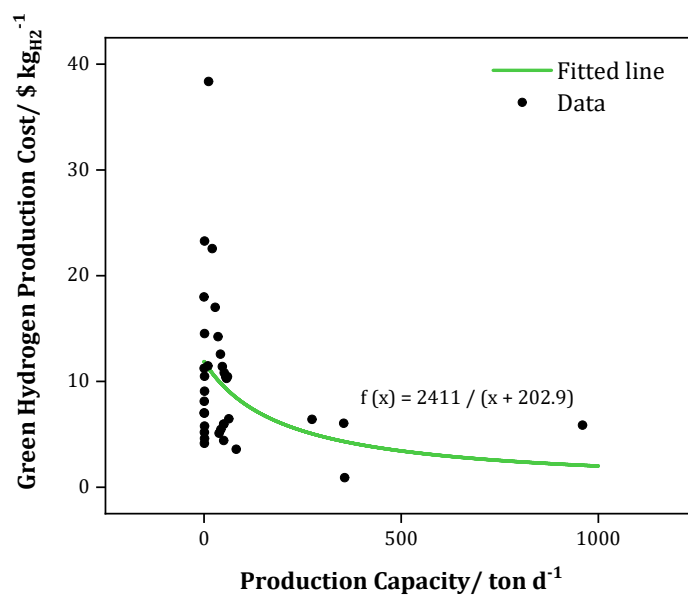

Fig. S10. Fitted line plot for green hydrogen production cost.



## References

- 1 E. S. Rubin, J. E. Davison and H. J. Herzog, *International Journal of Greenhouse Gas Control*, 2015, **40**, 378–400.
- 2 R. Chauvy, L. Dubois, P. Lybaert, D. Thomas and G. De Weireld, *Applied Energy*, 2020, **260**, 114249.
- 3 A. Ebrahimi, M. Meratizaman, H. A. Reyhani, O. Pourali and M. Amidpour, *Energy*, 2015, **90**, 1298–1316.
- 4 B. Parkinson, P. Balcombe, J. F. Speirs, A. D. Hawkes and K. Hellgardt, *Energy Environ Sci*, 2019, **12**, 19–40.
- 5 V. Utgikar and T. Thiesen, *International Journal of Hydrogen Energy*, 2006, **31**, 939–944.
- 6 R. Bhandari, C. A. Trudewind and P. Zapp, *Journal of Cleaner Production*, 2014, **85**, 151–163.
- 7 F. Suleman, I. Dincer and M. Agelin-Chaab, *International Journal of Hydrogen Energy*, 2016, **41**, 8364–8375.
- 8 F. Kerscher, A. Stary, S. Gleis, A. Ulrich, H. Klein and H. Spliethoff, *International Journal of Hydrogen Energy*, 2021, **46**, 19897–19912.
- 9 S. Sadeghi, S. Ghandehariun and M. A. Rosen, *Energy*, 2020, **208**, 118347.
- 10 A. Ozbilen, I. Dincer and M. A. Rosen, *International Journal of Hydrogen Energy*, 2011, **36**, 11321–11327.
- 11 A. Ozbilen, I. Dincer and M. A. Rosen, *Journal of Cleaner Production*, 2012, **33**, 202–216.
- 12 E. Cetinkaya, I. Dincer and G. F. Naterer, *International Journal of Hydrogen Energy*, 2012, **37**, 2071–2080.
- 13 Y. Khojasteh Salkuyeh, B. A. Saville and H. L. MacLean, *International Journal of*

- Hydrogen Energy*, 2017, **42**, 18894–18909.
- 14 F. Kerscher, A. Stary, S. Gleis, A. Ulrich, H. Klein and H. Spliethoff, *International Journal of Hydrogen Energy*, 2021, **46**, 19897–19912.
- 15 Y. Khojasteh Salkuyeh, B. A. Saville and H. L. MacLean, *International Journal of Hydrogen Energy*, 2017, **42**, 18894–18909.
- 16 R. Bhandari, C. A. Trudewind and P. Zapp, *Journal of Cleaner Production*, 2014, **85**, 151–163.
- 17 S. Sadeghi, S. Ghandehariun and M. A. Rosen, *Energy*, 2020, **208**, 118347.
- 18 E. Cetinkaya, I. Dincer and G. F. Naterer, *International Journal of Hydrogen Energy*, 2012, **37**, 2071–2080.
- 19 F. Kerscher, A. Stary, S. Gleis, A. Ulrich, H. Klein and H. Spliethoff, *International Journal of Hydrogen Energy*, 2021, **46**, 19897–19912.
- 20 B. J. Leal Pérez, J. A. Medrano Jiménez, R. Bhardwaj, E. Goetheer, M. van Sint Annaland and F. Gallucci, *Int J Hydrogen Energy*, 2021, **46**, 4917–4935.
- 21 J. Dufour, D. P. Serrano, J. L. Gálvez, J. Moreno and C. García, *International Journal of Hydrogen Energy*, 2009, **34**, 1370–1376.
- 22 B. Parkinson, M. Tabatabaei, D. C. Upham, B. Ballinger, C. Greig, S. Smart and E. McFarland, *International Journal of Hydrogen Energy*, 2018, **43**, 2540–2555.
- 23 A. Ozbilen, I. Dincer and M. A. Rosen, *International Journal of Hydrogen Energy*, 2011, **36**, 11321–11327.
- 24 M. R. Giraldi, J. L. François and D. Castro-Urieegas, *International Journal of Hydrogen Energy*, 2012, **37**, 13933–13942.
- 25 A. E. Karaca, I. Dincer and J. Gu, *International Journal of Hydrogen Energy*, 2020, **45**, 22148–22159.
- 26 Y. Bicer and I. Dincer, *International Journal of Hydrogen Energy*, 2017, **42**, 21559–21570.

- 27 A. Ozbilen, I. Dincer and M. A. Rosen, *Journal of Cleaner Production*, 2012, **33**, 202–216.
- 28 A. Ozbilen, I. Dincer and M. A. Rosen, *Journal of Cleaner Production*, 2012, **33**, 202–216.
- 29 W. C. Lattin and V. P. Utgikar, *International Journal of Hydrogen Energy*, 2009, **34**, 737–744.
